# Supplementary material
Source: HighWire-hosted journal article supplement (https://jnm.snmjournals.org/highwire/filestream/105312/field_highwire_adjunct_files/0/262790_Supplemental_Data.pdf)
Supplement: 262790_Supplemental_Data.pdf [file 262790_Supplemental_Data.pdf]

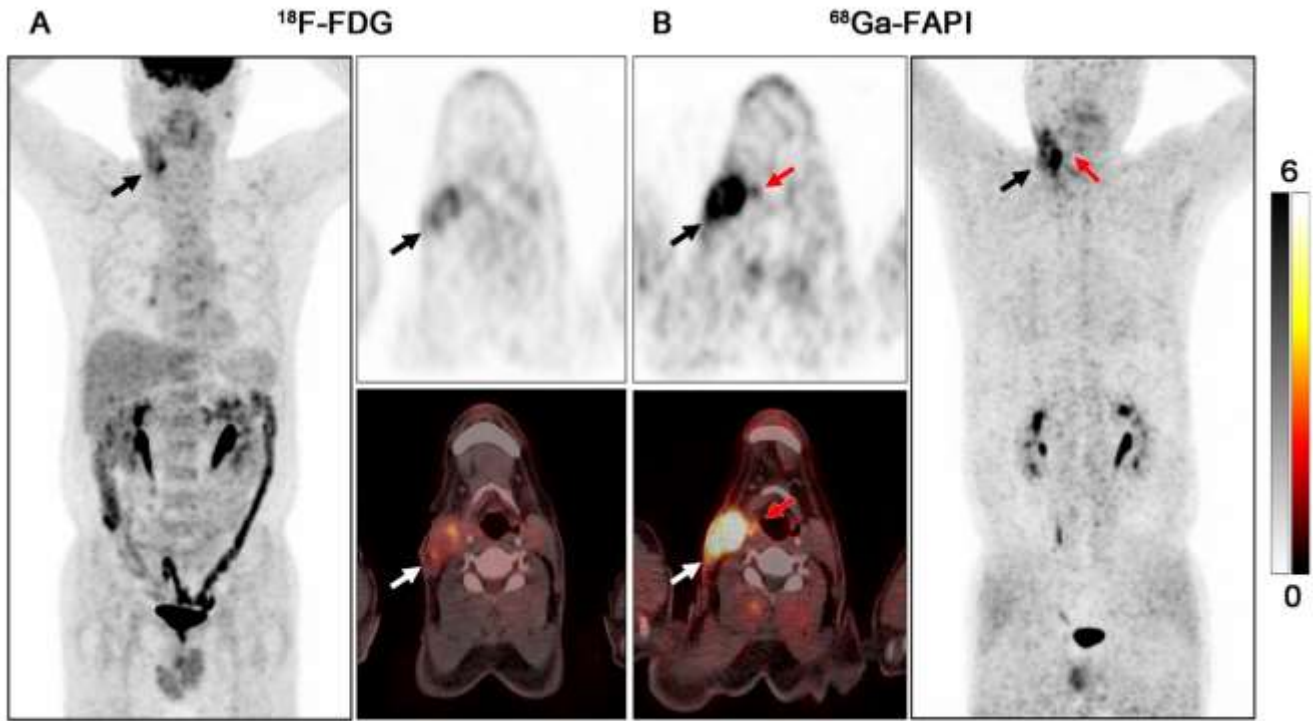

**SUPPLEMENTAL FIGURE 1.** PET/CT scans with the  $^{18}\text{F}$ -FDG (A) and  $^{68}\text{Ga}$ -FAPI (B) in a 54-year-old male patient (patient 7) with metastatic squamous cell carcinoma (SCC) of the right neck.  $^{18}\text{F}$ -FDG-PET/CT was negative for the detection of the primary. On  $^{68}\text{Ga}$ -FAPI-PET/CT, there was a moderate uptake in the right sinus piriformis (B, red arrow;  $\text{SUV}_{\text{max}} = 3.60$ ), while low background uptake was seen in the left sinus piriformis ( $\text{SUV}_{\text{max}}$  ratio = 3.27). Subsequent biopsy confirmed SCC. Black and white arrows indicate the metastatic lymph node.

**SUPPLEMENTAL TABLE 1.** Detailed information of primary and metastatic lesions on  $^{18}\text{F}$ -FDG and  $^{68}\text{Ga}$ -FAPI-PET/CT in eighteen patients

| Patients No. | Lesion        | Location                  | $^{18}\text{F}$ -FDG      |                      |       | $^{68}\text{Ga}$ -FAPI |                      |       |       |
|--------------|---------------|---------------------------|---------------------------|----------------------|-------|------------------------|----------------------|-------|-------|
|              |               |                           | tSUV <sub>max</sub>       | bSUV <sub>mean</sub> | TBR   | tSUV <sub>max</sub>    | bSUV <sub>mean</sub> | TBR   |       |
| 1            | Primary tumor | Nasopharynx top wall      | -                         | -                    | -     | 2.60                   | 1.10                 | 2.36  |       |
|              | Lymph node    | Neck level II B           | 6.20                      | 1.20                 | 5.17  | 3.30                   | 1.10                 | 3.00  |       |
|              | Lymph node    | Neck level II A           | 5.80                      | 1.20                 | 4.83  | 1.90                   | 1.10                 | 1.73  |       |
|              | Lymph node    | Neck level V A            | 3.80                      | 1.20                 | 3.17  | 1.60                   | 1.10                 | 1.45  |       |
| 2            | Primary tumor | Right palatine tonsil     | -                         | -                    | -     | 8.30                   | 1.20                 | 6.92  |       |
|              | Lymph node    | Neck level II B           | 5.90                      | 0.90                 | 6.56  | 6.80                   | 1.20                 | 5.67  |       |
|              | Lymph node    | Neck level II A           | 7.20                      | 0.90                 | 8.00  | 7.40                   | 1.20                 | 6.17  |       |
| 3            | Primary tumor | Right palatine tonsil     | -                         | -                    | -     | 11.50                  | 0.70                 | 16.43 |       |
|              | Lymph node    | Neck level II B           | 9.40                      | 0.90                 | 10.44 | 15.00                  | 0.70                 | 21.43 |       |
|              | Lymph node    | Neck level II B           | 6.80                      | 0.90                 | 7.56  | 13.80                  | 0.70                 | 19.71 |       |
| 4            | Primary tumor | Right submandibular gland | -                         | -                    | -     | 16.50                  | 0.60                 | 27.50 |       |
|              | Lymph node    | Neck level II B           | 9.90                      | 0.90                 | 11.00 | 14.10                  | 0.60                 | 23.50 |       |
|              | Lymph node    | Neck level II B           | 15.80                     | 0.90                 | 17.56 | 18.70                  | 0.60                 | 31.17 |       |
|              | Lymph node    | Neck level II B           | 10.70                     | 0.90                 | 11.89 | 12.40                  | 0.60                 | 20.67 |       |
|              | Lymph node    | Neck level II A           | 13.60                     | 0.90                 | 15.11 | 10.00                  | 0.60                 | 16.67 |       |
|              | Lymph node    | Neck level I B            | 3.90                      | 0.90                 | 4.33  | 8.60                   | 0.60                 | 14.33 |       |
|              | Lymph node    | Neck level III            | 8.20                      | 0.90                 | 9.11  | 8.30                   | 0.60                 | 13.83 |       |
|              | Lymph node    | Neck level IV             | 8.60                      | 0.90                 | 9.56  | 7.90                   | 0.60                 | 13.17 |       |
|              | Lymph node    | Chest level 1 R           | 12.50                     | 0.90                 | 13.89 | 13.10                  | 0.60                 | 21.83 |       |
|              | Lymph node    | Chest level 1 L           | 8.30                      | 0.90                 | 9.22  | 8.20                   | 0.60                 | 13.67 |       |
|              | Lymph node    | Chest level 2 R           | 12.80                     | 0.90                 | 14.22 | 15.70                  | 0.60                 | 26.17 |       |
|              | Lymph node    | Chest level 4 R           | 13.10                     | 0.90                 | 14.56 | 20.50                  | 0.60                 | 34.17 |       |
|              | Lymph node    | Chest level 5             | 14.40                     | 0.90                 | 16.00 | 16.60                  | 0.60                 | 27.67 |       |
|              | Lymph node    | Chest level 6             | 8.20                      | 0.90                 | 9.11  | 12.60                  | 0.60                 | 21.00 |       |
|              | Lymph node    | Chest level 7             | 9.00                      | 0.90                 | 10.00 | 16.50                  | 0.60                 | 27.50 |       |
|              | Lymph node    | Chest level 10 R          | 14.10                     | 0.90                 | 15.67 | 17.80                  | 0.60                 | 29.67 |       |
|              | Lymph node    | Chest level 10 L          | 9.40                      | 0.90                 | 10.44 | 18.00                  | 0.60                 | 30.00 |       |
|              |               | Bone                      | Fifth cervical vertebra   | 8.00                 | 0.90  | 8.89                   | 18.20                | 0.60  | 30.33 |
|              | 5             | Primary tumor             | Right submandibular gland | -                    | -     | -                      | 15.80                | 0.80  | 19.75 |

|    |               |                               |       |      |       |       |      |       |
|----|---------------|-------------------------------|-------|------|-------|-------|------|-------|
|    | Lymph node    | Neck level II B               | 1.90  | 0.80 | 2.38  | 12.40 | 0.80 | 15.50 |
|    | Lymph node    | Neck level II A               | 1.70  | 0.80 | 2.13  | 9.40  | 0.80 | 11.75 |
|    | Lymph node    | Neck level I B                | 4.50  | 0.80 | 5.63  | 10.40 | 0.80 | 13.00 |
|    | Lymph node    | Neck level III                | 1.70  | 0.80 | 2.13  | 12.20 | 0.80 | 15.25 |
|    | Lymph node    | Neck level III                | 2.00  | 0.80 | 2.50  | 6.90  | 0.80 | 8.63  |
|    | Lymph node    | Neck level III                | 3.80  | 0.80 | 4.75  | 7.00  | 0.80 | 8.75  |
|    | Lymph node    | Neck level IV                 | 3.30  | 0.80 | 4.13  | 10.60 | 0.80 | 13.25 |
|    | Lymph node    | Neck level IV                 | 2.70  | 0.80 | 3.38  | 6.40  | 0.80 | 8.00  |
|    | Bone          | Acetabulum                    | 8.60  | 0.80 | 10.75 | 20.20 | 0.80 | 25.25 |
| 6  | Primary tumor | Hypopharynx<br>posterior wall | -     | -    | -     | 3.20  | 0.90 | 3.56  |
|    | Lymph node    | Neck level II A               | 2.60  | 0.70 | 3.71  | 4.70  | 0.90 | 5.22  |
|    | Lymph node    | Neck level III                | 8.60  | 0.70 | 12.29 | 6.00  | 0.90 | 6.67  |
| 7  | Primary tumor | Right sinus piriformis        | -     | -    | -     | 3.60  | 0.90 | 4.00  |
|    | Lymph node    | Neck level III                | 7.60  | 0.90 | 8.44  | 12.80 | 0.90 | 14.22 |
| 8  | Lymph node    | Neck level III                | 25.60 | 0.70 | 36.57 | 15.20 | 0.80 | 19.00 |
| 9  | Lymph node    | Neck level II B               | 16.80 | 1.20 | 14.00 | 2.60  | 0.90 | 2.89  |
|    | Lymph node    | Neck level V A                | 17.50 | 1.20 | 14.58 | 5.70  | 0.90 | 6.33  |
|    | Lymph node    | Neck level II A               | 14.40 | 1.20 | 12.00 | 3.50  | 0.90 | 3.89  |
|    | Lymph node    | Neck level III                | 14.40 | 1.20 | 12.00 | 3.50  | 0.90 | 3.89  |
| 10 | Lymph node    | Neck level II A               | 7.30  | 0.80 | 9.13  | 3.10  | 1.20 | 2.58  |
| 11 | Lymph node    | Neck level II A               | 17.90 | 0.80 | 22.38 | 7.50  | 0.70 | 10.71 |
|    | Lymph node    | Neck level III                | 12.80 | 0.80 | 16.00 | 3.70  | 0.70 | 5.29  |
| 12 | Lymph node    | Neck level II B               | 5.10  | 0.60 | 8.50  | 10.00 | 0.70 | 14.29 |
|    | Lymph node    | Neck level II B               | 15.20 | 0.60 | 25.33 | 2.90  | 0.70 | 4.14  |
|    | Lymph node    | Neck level II A               | 12.10 | 0.60 | 20.17 | 4.00  | 0.70 | 5.71  |
| 13 | Lymph node    | Neck level I B                | 6.20  | 0.70 | 8.86  | 8.60  | 0.90 | 9.56  |
| 14 | Lymph node    | Neck level II B               | 8.40  | 0.60 | 14.00 | 9.20  | 0.90 | 10.22 |
|    | Lymph node    | Neck level II B               | 16.90 | 0.60 | 28.17 | 14.70 | 0.90 | 16.33 |
|    | Lymph node    | Neck level III                | 6.10  | 0.60 | 10.17 | 8.70  | 0.90 | 9.67  |
|    | Lymph node    | Left axillary                 | 4.50  | 0.60 | 7.50  | 5.10  | 0.90 | 5.67  |
|    | Lymph node    | Left axillary                 | 4.90  | 0.60 | 8.17  | 7.10  | 0.90 | 7.89  |
|    | Lymph node    | Left axillary                 | 4.90  | 0.60 | 8.17  | 5.90  | 0.90 | 6.56  |
|    | Lymph node    | Left axillary                 | 4.00  | 0.60 | 6.67  | 4.90  | 0.90 | 5.44  |

|    |            |                           |       |      |       |       |      |       |
|----|------------|---------------------------|-------|------|-------|-------|------|-------|
|    | Lymph node | Left axillary             | 4.80  | 0.60 | 8.00  | 5.20  | 0.90 | 5.78  |
| 15 | Lymph node | Neck level II A           | 2.10  | 0.80 | 2.63  | 2.90  | 0.80 | 3.63  |
| 16 | Lymph node | Neck level II B           | 14.20 | 0.90 | 15.78 | 8.10  | 0.80 | 10.13 |
|    | Lymph node | Neck level II B           | 13.70 | 0.90 | 15.22 | 13.90 | 0.80 | 17.38 |
|    | Lymph node | Neck level II B           | 10.00 | 0.90 | 11.11 | 13.60 | 0.80 | 17.00 |
|    | Bone       | Atlas                     | 7.70  | 0.90 | 8.56  | 4.60  | 0.80 | 5.75  |
|    | Bone       | Sixth cervical vertebra   | 6.40  | 0.90 | 7.11  | 4.60  | 0.80 | 5.75  |
|    | Bone       | Seventh cervical vertebra | 5.20  | 0.90 | 5.78  | 4.10  | 0.80 | 5.13  |
|    | Bone       | Second thoracic vertebra  | 8.50  | 0.90 | 9.44  | 3.60  | 0.80 | 4.50  |
|    | Bone       | Twelfth thoracic vertebra | 6.70  | 0.90 | 7.44  | 4.00  | 0.80 | 5.00  |
|    | Bone       | Second lumbar vertebra    | 8.40  | 0.90 | 9.33  | 8.10  | 0.80 | 10.13 |
|    | Bone       | Sacrum                    | 14.90 | 0.90 | 16.56 | 18.10 | 0.80 | 22.63 |
|    | Bone       | Right ilium               | 13.40 | 0.90 | 14.89 | 6.00  | 0.80 | 7.50  |
|    | Bone       | Left ilium                | 12.00 | 0.90 | 13.33 | 3.90  | 0.80 | 4.88  |
|    | Bone       | Right pubis               | 10.20 | 0.90 | 11.33 | 4.60  | 0.80 | 5.75  |
|    | Bone       | Left scapula              | 5.20  | 0.90 | 5.78  | 3.40  | 0.80 | 4.25  |
|    | Bone       | Right scapula             | 4.70  | 0.90 | 5.22  | 2.40  | 0.80 | 3.00  |
|    | Bone       | Left ninth rib            | 5.40  | 0.90 | 6.00  | 3.20  | 0.80 | 4.00  |
|    | Bone       | Right eighth rib          | 7.00  | 0.90 | 7.78  | 6.90  | 0.80 | 8.63  |
|    | Bone       | Right femur               | 5.50  | 0.90 | 6.11  | 2.40  | 0.80 | 3.00  |
| 17 | Lymph node | Neck level II B           | 10.20 | 1.10 | 9.27  | 8.10  | 0.50 | 16.20 |
|    | Lymph node | Neck level II A           | 8.50  | 1.10 | 7.73  | 7.60  | 0.50 | 15.20 |
|    | Lymph node | Neck level II A           | 7.70  | 1.10 | 7.00  | 7.10  | 0.50 | 14.20 |
| 18 | Lymph node | Neck level II B           | 23.70 | 1.00 | 23.70 | 10.90 | 0.80 | 13.63 |
|    | Lymph node | Neck level II A           | 11.20 | 1.00 | 11.20 | 10.20 | 0.80 | 12.75 |
|    | Lymph node | Neck level II A           | 6.00  | 1.00 | 6.00  | 5.40  | 0.80 | 6.75  |
|    | Lymph node | Neck level II B           | 3.40  | 1.00 | 3.40  | 3.80  | 0.80 | 4.75  |

tSUV<sub>max</sub> = the maximum SUV of tumor lesion; bSUV<sub>mean</sub> = the mean SUV of muscle; TBR = tumor-to-background ratio
